# Supplementary material for: Child Abuse and Neglect Awareness among Medical Students
Source: MDPI journal article supplement (doi:10.3390/children9060885), 2022-06-14
Supplement: s1 [file s1]

**Table(s)****Table S1: Demographic details of the participants and awareness on child abuse and neglect.**

| <b>Characteristic</b>                                                               | <b>N</b>    | <b>%</b> |
|-------------------------------------------------------------------------------------|-------------|----------|
| <b>Age (in years)</b> Median                                                        | 22.0        |          |
| (Interquartile range IQR)                                                           | (20.0,23.0) |          |
| Mean±SD                                                                             | 21.75±1.6   |          |
| <b>Gender</b>                                                                       |             |          |
| Male                                                                                | 202         | 53.0     |
| Female                                                                              | 179         | 47.0     |
| <b>Academic year</b>                                                                |             |          |
| Third                                                                               | 191         | 50.1     |
| Sixth                                                                               | 190         | 49.9     |
| <b>Are you aware about child abuse and neglect?</b>                                 |             |          |
| No                                                                                  | 36          | 9.4      |
| Yes                                                                                 | 345         | 90.6     |
| <b>Source of information on child abuse and neglect (Multiple response allowed)</b> |             |          |
| Social media                                                                        | 311         | 37.6     |
| Medical college                                                                     | 187         | 22.6     |
| Relatives and friends                                                               | 178         | 21.5     |
| Mass media                                                                          | 152         | 18.4     |

**Table S2: Participant's opinion on the importance and the level of prevalence of child abuse and neglect in saudi population.**

| <b>Characteristic</b>                                                                            | <b>N</b> | <b>%</b> |
|--------------------------------------------------------------------------------------------------|----------|----------|
| <b>Do you think the topic on child abuse and neglect is important in medical field?</b>          |          |          |
| No                                                                                               | 5        | 1.3      |
| Yes                                                                                              | 367      | 96.3     |
| Uncertain                                                                                        | 9        | 2.4      |
| <b>Have you seen or encountered a case of child abuse and neglect during your medical study?</b> |          |          |
| No                                                                                               | 306      | 80.3     |
| Yes                                                                                              | 75       | 19.7     |
| <b>Do you believe child abuse and neglect exists in Saudi's population?</b>                      |          |          |
| No                                                                                               | 6        | 1.6      |
| Yes                                                                                              | 368      | 96.6     |
| Uncertain                                                                                        | 7        | 1.8      |
| <b>How common do you think child abuse and neglect is in Saudi's population?</b>                 |          |          |
| Rare                                                                                             | 28       | 7.3      |
| Not common (neutral)                                                                             | 115      | 30.2     |
| Common                                                                                           | 174      | 45.7     |
| Very common                                                                                      | 64       | 16.8     |
| <b>Do you think child abuse and neglect will affect his/her future?</b>                          |          |          |
| No                                                                                               | 2        | 0.5      |

|           |     |      |
|-----------|-----|------|
| Yes       | 372 | 97.6 |
| Uncertain | 7   | 1.8  |

**Table S3: Participant's opinion on their responsibility in the issue and importance of courses or sessions on child abuse and neglect.**

| Characteristic                                                                                                        | N   | %    |
|-----------------------------------------------------------------------------------------------------------------------|-----|------|
| <b>As a future physician, generally at any discipline, do you think you have a role with child abuse and neglect?</b> |     |      |
| No                                                                                                                    | 11  | 2.9  |
| Yes                                                                                                                   | 321 | 84.3 |
| Uncertain                                                                                                             | 49  | 12.9 |
| <b>Do you have an interest to deal with child abuse and neglect?</b>                                                  |     |      |
| No                                                                                                                    | 63  | 16.5 |
| Yes                                                                                                                   | 217 | 57.0 |
| Uncertain                                                                                                             | 101 | 26.5 |
| <b>Have you taken an academic course(s) or session(s) about child abuse and neglect in your medical college?</b>      |     |      |
| No                                                                                                                    | 271 | 71.1 |
| Yes                                                                                                                   | 110 | 28.9 |
| <b>How good do you think those academic course(s) or session(s) about child abuse and neglect were?</b>               |     |      |
| Insufficient                                                                                                          | 19  | 17.3 |
| Sufficient                                                                                                            | 20  | 18.2 |
| Fair                                                                                                                  | 56  | 50.9 |
| Good                                                                                                                  | 11  | 10.0 |

|                                                                                        |     |      |
|----------------------------------------------------------------------------------------|-----|------|
| Excellent                                                                              | 4   | 3.6  |
| <b>Do you like to receive more courses and sessions about child abuse and neglect?</b> |     |      |
| No                                                                                     | 33  | 8.7  |
| Yes                                                                                    | 268 | 70.3 |
| Uncertain                                                                              | 80  | 21.0 |

**Table S4: Participant's response on the legal ways child abuse and neglect is dealt and preventive measures.**

| Characteristic                                                                                                  | N   | %    |
|-----------------------------------------------------------------------------------------------------------------|-----|------|
| <b>Who do you think deals with child abuse and neglect?<br/>(Multiple response allowed)</b>                     |     |      |
| Social workers                                                                                                  | 347 | 25.5 |
| Physicians                                                                                                      | 329 | 24.2 |
| Police                                                                                                          | 306 | 22.5 |
| Nurses                                                                                                          | 209 | 15.4 |
| Administrators                                                                                                  | 169 | 12.4 |
| <b>Do you think there is a legal system -legalization- to deal with child abuse and neglect in our kingdom?</b> |     |      |
| No                                                                                                              | 57  | 15.0 |
| Yes                                                                                                             | 324 | 85.0 |
| <b>Who do you think abuse children the most (the abuser)?</b>                                                   |     |      |
| Parents                                                                                                         | 219 | 57.5 |
| Relatives (excluding parents)                                                                                   | 51  | 13.4 |
| Housemaids                                                                                                      | 83  | 21.8 |
| Drivers (eg. school drivers or personal drivers)                                                                | 12  | 3.1  |
| Teacher                                                                                                         | 16  | 4.2  |

|                                                                                                |     |      |
|------------------------------------------------------------------------------------------------|-----|------|
| <b>Do you think that the child abuser has a psychological disorder?</b>                        |     |      |
| Never                                                                                          | 5   | 1.3  |
| Rarely                                                                                         | 11  | 2.9  |
| Sometimes                                                                                      | 119 | 31.2 |
| Commonly                                                                                       | 163 | 42.8 |
| Always                                                                                         | 69  | 18.1 |
| Uncertain                                                                                      | 14  | 3.7  |
| <b>What do you think is the most effective preventive measure for child abuse and neglect?</b> |     |      |
| Public education                                                                               |     |      |
| Medical staff education                                                                        | 102 | 26.8 |
| School education                                                                               | 16  | 4.2  |
| Legalization and law enforcement                                                               | 29  | 7.6  |
|                                                                                                | 234 | 61.4 |

**Table S5: Academic year response comparison.**

| CHARACTERESTICS                                                                                  | GENDER           |                        | P<br>VALUE | ACADEMIC YEAR                |                              | P<br>VALUE |
|--------------------------------------------------------------------------------------------------|------------------|------------------------|------------|------------------------------|------------------------------|------------|
|                                                                                                  | Males<br>No: 202 | FEMALES No:<br>No: 179 |            | 3 <sup>rd</sup> Y<br>No: 191 | 6 <sup>th</sup> Y<br>No: 190 |            |
|                                                                                                  | No. (%)          | No. (%)                |            | No. (%)                      | No. (%)                      |            |
| <b>Are you aware about child abuse and neglect?</b>                                              |                  |                        |            |                              |                              |            |
| No                                                                                               | 22 (10.9)        | 14 (7.8)               | 0.307      | 25 (13.1)                    | 11 (5.8)                     | 0.015      |
| Yes                                                                                              | 180 (89.1)       | 165 (92.2)             |            | 166 (86.9)                   | 179 (94.2)                   |            |
| <b>Do you think the topic on child abuse and neglect is important in medical field?</b>          |                  |                        |            |                              |                              |            |
| No                                                                                               | 5 (2.5)          | 0 (0.0)                | 0.000*     | 4 (2.1)                      | 1 (0.5)                      | 0.019*     |
| Yes                                                                                              | 188 (93.1)       | 179 (100.0)            |            | 179 (93.7)                   | 188 (98.9)                   |            |
| Uncertain                                                                                        | 9 (4.5)          | 0 (0.0)                |            | 8 (4.2)                      | 1 (0.5)                      |            |
| <b>Have you seen or encountered a case of child abuse and neglect during your medical study?</b> |                  |                        |            |                              |                              |            |
| No                                                                                               | 163 (80.7)       | 143 (79.9)             | 0.844      | 164 (85.9)                   | 142 (74.7)                   | 0.006      |
| Yes                                                                                              | 39 (19.3)        | 36 (20.1)              |            | 27 (14.1)                    | 48 (25.3)                    |            |
| <b>Do you believe child abuse and neglect exists in Saudi's population?</b>                      |                  |                        |            |                              |                              |            |
| No                                                                                               | 6 (3.0)          | 0 (0.0)                | 0.060*     | 4 (2.1)                      | 2 (1.1)                      | 0.386*     |
| Yes                                                                                              | 192 (95.0)       | 176 (98.3)             |            | 182 (95.3)                   | 186 (97.9)                   |            |

|                                                                                                                       |            |            |        |            |            |       |
|-----------------------------------------------------------------------------------------------------------------------|------------|------------|--------|------------|------------|-------|
| Uncertain                                                                                                             | 4 (2.0)    | 3 (1.7)    |        | 5 (2.6)    | 2 (1.1)    |       |
| <b>How common do you think child abuse and neglect is in Saudi's population?</b>                                      |            |            |        |            |            |       |
| Rare                                                                                                                  | 16 (7.9)   | 12 (6.7)   | 0.012  | 20 (10.5)  | 8 (4.2)    | 0.088 |
| Not common (neutral)                                                                                                  | 74 (36.6)  | 41 (22.9)  |        | 60 (31.4)  | 55 (28.9)  |       |
| Common                                                                                                                | 86 (42.6)  | 88 (49.2)  |        | 80 (41.9)  | 94 (49.5)  |       |
| Very common                                                                                                           | 26 (12.9)  | 38 (21.2)  |        | 31 (16.2)  | 33 (17.4)  |       |
| <b>Do you think child abuse and neglect will affect his/her future?</b>                                               |            |            |        |            |            |       |
| No                                                                                                                    | 2 (1.0)    | 0 (0.0)    | 0.631* | 1 (0.5)    | 1 (0.5)    | 0.122 |
| Yes                                                                                                                   | 196 (97.0) | 176 (98.3) |        | 184 (96.3) | 188 (98.9) |       |
| Uncertain                                                                                                             | 4 (2.0)    | 3 (1.7)    |        | 6 (3.1)    | 1 (0.5)    |       |
| <b>As a future physician, generally at any discipline, do you think you have a role with child abuse and neglect?</b> |            |            |        |            |            |       |
| No                                                                                                                    | 10 (5.0)   | 1 (0.6)    | 0.000  | 8 (4.2)    | 3 (1.6)    | 0.000 |
| Yes                                                                                                                   | 154 (76.2) | 167 (93.3) |        | 143 (74.9) | 178 (93.7) |       |
| Uncertain                                                                                                             | 38 (18.8)  | 11 (6.1)   |        | 40 (20.9)  | 9 (4.7)    |       |
| <b>Do you have an interest to deal with child abuse and neglect?</b>                                                  |            |            |        |            |            |       |
| No                                                                                                                    | 38 (18.8)  | 25 (14.0)  | 0.286  | 27 (14.1)  | 36 (18.9)  | 0.277 |
| Yes                                                                                                                   | 108 (53.5) | 109 (60.9) |        | 116 (60.7) | 101 (53.2) |       |

|                                                                                                                  |            |            |        |            |            |        |
|------------------------------------------------------------------------------------------------------------------|------------|------------|--------|------------|------------|--------|
| Uncertain                                                                                                        | 56 (27.7)  | 45 (25.1)  |        | 48 (25.1)  | 53 (27.9)  |        |
| <b>Have you taken an academic course(s) or session(s) about child abuse and neglect in your medical college?</b> |            |            |        |            |            |        |
| No                                                                                                               | 138 (68.3) | 133 (74.3) | 0.198  | 169 (88.5) | 102 (53.7) | 0.000  |
| Yes                                                                                                              | 64 (31.7)  | 46 (25.7)  |        | 22 (11.5)  | 88 (46.3)  |        |
| <b>How good do you think those academic course(s) or session(s) about child abuse and neglect were?</b>          |            |            |        |            |            | 1.000* |
| Insufficient                                                                                                     | 8 (12.5)   | 11 (23.9)  | 0.057* | 4 (18.2)   | 15 (17.0)  |        |
| Sufficient                                                                                                       | 14 (21.9)  | 6 (13.0)   |        | 4 (18.2)   | 16 (18.2)  |        |
| Fair                                                                                                             | 35 (54.7)  | 21 (45.7)  |        | 11 (50.0)  | 45 (51.1)  |        |
| Good                                                                                                             | 7 (10.9)   | 4 (8.7)    |        | 2 (9.1)    | 9 (10.2)   |        |
| Excellent                                                                                                        | 0 (0.0)    | 4 (8.7)    |        | 1 (4.5)    | 3 (3.4)    |        |
| <b>Do you like to receive more courses and sessions about child abuse and neglect?</b>                           |            |            |        |            |            |        |
| No                                                                                                               | 28 (13.9)  | 5 (2.8)    | 0.000  | 17 (8.9)   | 16 (8.4)   | 0.438  |
| Yes                                                                                                              | 128 (63.4) | 140 (78.2) |        | 129 (67.5) | 139 (73.2) |        |
| Uncertain                                                                                                        | 46 (22.8)  | 34 (19.0)  |        | 45 (23.6)  | 35 (18.4)  |        |



|                                                                                                                 |            |            |        |            |            |        |
|-----------------------------------------------------------------------------------------------------------------|------------|------------|--------|------------|------------|--------|
| <b>Do you think there is a legal system -legalization- to deal with child abuse and neglect in our kingdom?</b> |            |            |        |            |            |        |
| No                                                                                                              | 23 (11.4)  | 34 (19.0)  | 0.038  | 35 (18.3)  | 22 (11.6)  | 0.065  |
| Yes                                                                                                             | 179 (88.6) | 145 (81.0) |        | 156 (81.7) | 168 (88.4) |        |
| <b>Who do you think abuse children the most (the abuser)?</b>                                                   |            |            |        |            |            |        |
| Parents                                                                                                         | 101 (50.0) | 118 (65.9) | 0.001  | 106 (55.5) | 113 (59.5) | 0.001  |
| Relatives (excluding parents)                                                                                   | 35 (17.3)  | 16 (8.9)   |        | 34 (17.8)  | 17 (8.9)   |        |
| Housemaids                                                                                                      | 43 (21.3)  | 40 (22.3)  |        | 35 (18.3)  | 48 (25.3)  |        |
| Drivers (eg. school drivers or personal drivers)                                                                | 9 (4.5)    | 3 (1.7)    |        | 10 (5.2)   | 2 (1.1)    |        |
| Teacher                                                                                                         | 14 (6.9)   | 2 (1.1)    |        | 6 (3.1)    | 10 (5.3)   |        |
| <b>Do you think that the child abuser has a psychological disorder?</b>                                         |            |            |        |            |            |        |
| Never                                                                                                           | 3 (1.5)    | 2 (1.1)    | 0.026* | 5 (2.6)    | 0 (0.0)    | 0.000* |
| Rarely                                                                                                          | 7 (3.5)    | 4 (2.2)    |        | 8 (4.2)    | 3 (1.6)    |        |
| Sometimes                                                                                                       | 61 (30.2)  | 58 (32.4)  |        | 40 (20.9)  | 79 (41.6)  |        |
| Commonly                                                                                                        | 94 (46.5)  | 69 (38.5)  |        | 84 (44.0)  | 79 (41.6)  |        |
| Always                                                                                                          | 26 (12.9)  | 43 (24.0)  |        | 45 (23.6)  | 24 (12.6)  |        |
| Uncertain                                                                                                       | 11 (5.4)   | 3 (1.7)    |        | 9 (4.7)    | 5 (2.6)    |        |

|                                                                                                |            |            |       |            |            |       |
|------------------------------------------------------------------------------------------------|------------|------------|-------|------------|------------|-------|
| <b>What do you think is the most effective preventive measure for child abuse and neglect?</b> |            |            |       |            |            |       |
| Public education                                                                               | 63 (31.2)  | 39 (21.8)  | 0.047 | 50 (26.2)  | 52 (27.4)  | 0.919 |
| Medical staff education                                                                        | 9 (4.5)    | 7 (3.9)    |       | 8 (4.2)    | 8 (4.2)    |       |
| School education                                                                               | 19 (9.4)   | 10 (5.6)   |       | 13 (6.8)   | 16 (8.4)   |       |
| Legalization and law enforcement                                                               | 111 (55.0) | 123 (68.7) |       | 120 (62.8) | 114 (60.0) |       |

**Table S6: Comparison of the gender response in each academic year.**

| Characteristic                                                                          | Academic year |            | P<br><br>value | Academic year |           | P<br><br>value |
|-----------------------------------------------------------------------------------------|---------------|------------|----------------|---------------|-----------|----------------|
|                                                                                         | 3rd (N = 191) |            |                | 6th (N = 190) |           |                |
|                                                                                         | Male          | Female     |                | Male          | Female    |                |
|                                                                                         | No. (%)       | No. (%)    |                | No. (%)       | No. (%)   |                |
| <b>Are you aware about child abuse and neglect?</b>                                     |               |            |                |               |           |                |
| No                                                                                      | 12 (12.1)     | 13 (14.1)  | 0.681          | 10 (9.7)      | 1 (0.5)   | 0.012          |
| Yes                                                                                     | 87 (87.9)     | 79 (85.9)  |                | 93 (90.3)     | 86 (98.9) |                |
| <b>Do you think the topic on child abuse and neglect is important in medical field?</b> |               |            |                |               |           |                |
| No                                                                                      | 4 (4.0)       | 0 (0.0)    | 0.001*         | 1 (1.0)       | 0 (0.0)   | 1.000*         |
| Yes                                                                                     | 87 (87.9)     | 92 (100.0) |                | 101 (98.1)    | 87 (100)  |                |
| Uncertain                                                                               | 8 (8.1)       | 0 (0.0)    |                | 1 (1.0)       | 0 (0.0)   |                |

|                                                                                                  |           |           |        |           |           |        |
|--------------------------------------------------------------------------------------------------|-----------|-----------|--------|-----------|-----------|--------|
| <b>Have you seen or encountered a case of child abuse and neglect during your medical study?</b> |           |           |        |           |           |        |
| No                                                                                               | 87 (87.9) | 77 (83.7) | 0.407  | 76 (73.8) | 66 (75.9) | 0.743  |
| Yes                                                                                              | 12 (12.1) | 15 (16.3) |        | 27 (26.2) | 21 (24.1) |        |
| <b>Do you believe child abuse and neglect exists in Saudi’s population?</b>                      |           |           |        |           |           |        |
| No                                                                                               | 4 (4.0)   | 0 (0.0)   | 0.152* | 2 (1.9)   | 0 (0.0)   | 0.251* |
| Yes                                                                                              | 93 (93.9) | 89 (96.7) |        | 99 (96.1) | 87 (100)  |        |
| Uncertain                                                                                        | 2 (2.0)   | 3 (3.3)   |        | 2 (1.9)   | 0 (0.0)   |        |
| <b>How common do you think child abuse and neglect is in Saudi’s population?</b>                 |           |           |        |           |           |        |
| Rare                                                                                             | 11 (11.1) | 9 (9.8)   | 0.013  | 5 (4.9)   | 3 (3.4)   | 0.513* |
| Not common (neutral)                                                                             | 40 (40.4) | 20 (21.7) |        | 34 (33.0) | 21 (24.1) |        |
| Common                                                                                           | 38 (38.4) | 42 (45.7) |        | 48 (46.6) | 46 (52.9) |        |
| Very common                                                                                      | 10 (10.1) | 21 (22.8) |        | 16 (15.5) | 17 (19.5) |        |

|                                                                                                                       |           |           |        |            |           |        |
|-----------------------------------------------------------------------------------------------------------------------|-----------|-----------|--------|------------|-----------|--------|
| <b>Do you think child abuse and neglect will affect his/her future?</b>                                               |           |           |        |            |           |        |
| No                                                                                                                    | 1 (1.0)   | 0 (0.0)   | 0.684* | 1 (1.0)    | 0 (0.0)   | 0.707* |
| Yes                                                                                                                   | 94 (94.9) | 90 (97.8) |        | 102 (99.0) | 86 (98.9) |        |
| Uncertain                                                                                                             | 4 (4.0)   | 2 (2.2)   |        | 0 (0.0)    | 1 (1.1)   |        |
| <b>As a future physician, generally at any discipline, do you think you have a role with child abuse and neglect?</b> |           |           |        |            |           |        |
| No                                                                                                                    | 7 (7.1)   | 1 (1.1)   | 0.000* | 3 (2.9)    | 0 (0.0)   | 0.101* |
| Yes                                                                                                                   | 61 (61.6) | 82 (89.1) |        | 93 (90.3)  | 85 (97.7) |        |
| Uncertain                                                                                                             | 31 (31.3) | 9 (9.8)   |        | 7 (6.8)    | 2 (2.3)   |        |
| <b>Do you have an interest to deal with child abuse and neglect?</b>                                                  |           |           |        |            |           |        |
| No                                                                                                                    | 18 (18.2) | 9 (9.8)   | 0.227  | 20 (19.4)  | 16 (18.4) | 0.698  |
| Yes                                                                                                                   | 56 (56.6) | 60 (65.2) |        | 52 (50.5)  | 49 (56.3) |        |
| Uncertain                                                                                                             | 25 (25.3) | 23 (25.0) |        | 31 (30.1)  | 22 (25.3) |        |

|                                                                                                                  |           |           |        |           |           |        |
|------------------------------------------------------------------------------------------------------------------|-----------|-----------|--------|-----------|-----------|--------|
| <b>Have you taken an academic course(s) or session(s) about child abuse and neglect in your medical college?</b> |           |           |        |           |           |        |
|                                                                                                                  | 89 (89.9) | 80 (87.0) | 0.524  | 49 (47.6) | 53 (60.9) | 0.066  |
| No                                                                                                               | 10 (10.1) | 12 (13.0) |        | 54 (52.4) | 34 (39.1) |        |
| Yes                                                                                                              |           |           |        |           |           |        |
| <b>How good do you think those academic course(s) or session(s) about child abuse and neglect were?</b>          |           |           |        |           |           |        |
| Insufficient                                                                                                     | 2 (20.0)  | 2 (16.7)  | 0.775* | 6 (11.1)  | 9 (26.5)  | 0.043* |
| Sufficient                                                                                                       | 2 (20.0)  | 2 (16.7)  |        | 12 (22.2) | 4 (11.8)  |        |
| Fair                                                                                                             | 6 (60.0)  | 5 (41.7)  |        | 29 (53.7) | 16 (47.1) |        |
| Good                                                                                                             | 0 (0.0)   | 2 (16.7)  |        | 7 (13.0)  | 2 (5.9)   |        |
| Excellent                                                                                                        | 0 (0.0)   | 1 (8.3)   |        | 0 (0.0)   | 3 (8.8)   |        |

|                                                                                                                  |           |           |        |           |           |        |
|------------------------------------------------------------------------------------------------------------------|-----------|-----------|--------|-----------|-----------|--------|
| <b>Do you like to receive more courses and sessions about child abuse and neglect?</b>                           |           |           |        |           |           |        |
| No                                                                                                               | 15 (15.2) | 2 (2.2)   | 0.001  | 13 (12.6) | 3 (3.4)   | 0.076  |
| Yes                                                                                                              | 56 (56.6) | 73 (79.3) |        | 72 (69.9) | 67 (77.0) |        |
| Uncertain                                                                                                        | 28 (28.3) | 17 (18.5) |        | 18 (17.5) | 17(19.5)  |        |
| <b>Do you think there is a legal system - legalization- to deal with child abuse and neglect in our kingdom?</b> |           |           |        |           |           |        |
| No                                                                                                               | 14 (14.1) | 21 (22.8) | 0.121  | 9 (8.7)   | 13 (14.9) | 0.183  |
| Yes                                                                                                              | 85 (85.9) | 71 (77.2) |        | 94 (91.3) | 74 (85.1) |        |
| <b>Who do you think abuse children the most (the abuser)?</b>                                                    |           |           |        |           |           |        |
| Parents                                                                                                          | 48 (48.5) | 58 (63.0) | 0.021* | 53 (51.5) | 60 (69.0) | 0.028* |
| Relatives (excluding parents)                                                                                    | 24 (24.2) | 10 (10.9) |        | 11 (10.7) | 6 (6.9)   |        |
| Housemaids                                                                                                       | 15 (15.2) | 20 (21.7) |        | 28 (27.2) | 20 (23.0) |        |
| Drivers (eg. school or personal drivers)                                                                         | 7 (7.1)   | 3 (3.3)   |        | 2 (1.9)   | 0 (0.0)   |        |
| Teacher                                                                                                          | 5 (5.1)   | 1 (1.1)   |        | 9 (8.7)   | 1 (1.1)   |        |

|                                                                                                |           |           |        |           |           |        |
|------------------------------------------------------------------------------------------------|-----------|-----------|--------|-----------|-----------|--------|
| <b>Do you think that the child abuser has a psychological disorder?</b>                        |           |           |        |           |           |        |
| Never                                                                                          | 3 (3.0)   | 2 (2.2)   | 0.034* | 0 (0.0)   | 0 (0.0)   | 0.577* |
| Rarely                                                                                         | 5 (5.1)   | 3 (3.3)   |        | 2 (1.9)   | 1 (1.1)   |        |
| Sometimes                                                                                      | 17 (17.2) | 23 (25.0) |        | 44 (42.7) | 35 (40.2) |        |
| Commonly                                                                                       | 51 (51.5) | 33 (35.9) |        | 43 (41.7) | 36 (41.4) |        |
| Always                                                                                         | 16 (16.2) | 29 (31.5) |        | 10 (9.7)  | 14 (16.1) |        |
| Uncertain                                                                                      | 7(7.1)    | 2 (2.2)   |        | 4 (3.9)   | 1 (1.1)   |        |
| <b>What do you think is the most effective preventive measure for child abuse and neglect?</b> |           |           |        |           |           |        |
| Public education                                                                               | 27 (27.3) | 23 (25.0) | 0.097* | 36 (35.0) | 16 (18.4) | 0.057* |
| Medical staff education                                                                        | 6 (6.1)   | 2 (2.2)   |        | 3 (2.9)   | 5 (5.7)   |        |
| School education                                                                               | 10 (10.1) | 3 (3.3)   |        | 9 (8.7)   | 7 (8.0)   |        |
| Legalization and law enforcement                                                               | 56 (56.6) | 64 (69.6) |        | 55 (53.4) | 59 (67.8) |        |

\* – Fisher's exact test
